# Supplementary material for: Functional genomics analysis identifies T and NK cell activation as a driver of epigenetic clock progression
Source: Genome Biol. 2022 Jan 14;23:24. doi: 10.1186/s13059-021-02585-8 (PMC8759260; doi:10.1186/s13059-021-02585-8)
Supplement: Supplementary file 4 — Additional file 4: Table S3. Overlap between meQTLs affecting clock CpG DNAm and eQTLs affecting trans-gene expression. [file 13059_2021_2585_MOESM4_ESM.xlsx]

## Sheet: cis-meQTLs with trans-eQTLs
This table shows the 9 clock CpGs which were driven by a cis-meQTLs that was also a trans-eQTL for one or more trans-genes.
The QTLs were not pruned for LD, so some CpG-gene pairs were found to share with multiple QTLs.
In total, 9 clock CpGs were found to share QTLs with 31 trans-genes.
Ensembl ID	Symbol	cg12105450	cg03270204	cg02281167	cg16150435	cg06805925	cg07547549	cg03771840	cg21467614	cg04749507
ENSG00000153563	CD8A	0	6	1	16	0	0	1	0	0
ENSG00000089692	LAG3	0	0	0	3	0	0	0	0	0
ENSG00000135960	EDAR	0	0	0	1	0	0	0	1	0
ENSG00000100450	GZMH	0	0	1	4	0	0	0	0	0
ENSG00000135631	RAB11FIP5	0	0	0	5	0	0	0	0	0
ENSG00000186854	TRABD2A	0	0	0	0	0	0	0	0	1
ENSG00000060140	STYK1	0	0	0	1	0	0	0	0	0
ENSG00000138795	LEF1	0	0	0	0	0	6	0	0	0
ENSG00000099204	ABLIM1	0	0	0	0	0	0	0	1	0
ENSG00000139187	KLRG1	0	0	0	7	0	0	0	0	0
ENSG00000100298	APOBEC3H	0	0	2	16	0	0	0	0	0
ENSG00000176083	ZNF683	0	0	0	5	0	0	0	0	0
ENSG00000172116	CD8B	0	0	0	1	0	0	0	0	0
ENSG00000163508	EOMES	2	4	0	32	0	0	0	0	0
ENSG00000197077	KIAA1671	0	0	0	7	0	0	0	0	0
ENSG00000116824	CD2	0	0	0	1	0	0	0	0	0
ENSG00000189283	FHIT	0	0	0	12	0	0	0	0	0
ENSG00000196814	MVB12B	0	0	0	1	0	0	0	0	0
ENSG00000126353	CCR7	0	0	0	1	0	0	0	0	0
ENSG00000145220	LYAR	0	0	1	0	0	0	0	0	0
ENSG00000147457	CHMP7	0	1	0	1	0	0	0	0	1
ENSG00000091129	NRCAM	0	0	0	0	0	0	0	12	0
ENSG00000138311	ZNF365	0	0	0	3	0	0	0	0	0
ENSG00000129270	MMP28	0	0	0	0	0	0	0	1	11
ENSG00000104490	NCALD	0	2	0	19	0	0	0	0	0
ENSG00000112182	BACH2	0	0	0	0	1	0	0	0	0
ENSG00000165617	DACT1	0	0	0	0	0	0	0	0	3
ENSG00000008283	CYB561	0	0	0	0	0	0	0	11	0
ENSG00000113088	GZMK	2	0	0	0	0	0	0	0	0
ENSG00000173114	LRRN3	0	0	0	0	0	0	0	0	8
ENSG00000172215	CXCR6	3	0	0	0	0	0	0	0	0

## Sheet: cis-eQTLs with trans-meQTLs
This table shows the 2 trans-genes which were driven by a cis-eQTLs that was also a trans-meQTL for one or more clock CpGs.
The QTLs were not pruned for LD, so some CpG-gene pairs were found to share with multiple QTLs.
In total, 2 trans-genes were found to share QTLs with 2 clock CpGs.
Ensembl ID	Symbol	cg19853760	cg12948621
ENSG00000162676	GFI1	1	0
ENSG00000121413	ZSCAN18	0	4
